# Supplementary material for: Highly selective photothermal conversion of CO2 to ethylene using hierarchical boxwood ball-like Weyl semimetal WTe2 catalysts
Source: Royal Society of Chemistry journal article supplement (doi:10.1039/d3ta06389e), 2023-11-27
Supplement: d3ta06389e1.pdf [file d3ta06389e1.pdf]

## Supporting Information

### Highly Selective Photothermal Conversion of CO<sub>2</sub> to Ethylene Using Hierarchical Boxwood Ball-like Weyl Semimetal WTe<sub>2</sub> Catalysts

Xiaoyue Zhang,<sup>a</sup> Chaoran Dong,<sup>a</sup> Yong Yang,<sup>b,\*</sup> Yingjie Hu,<sup>c</sup> Lizhi Wu,<sup>b</sup> Yu Gu,<sup>d</sup> Kan Zhang,<sup>d</sup> Jinyou Shen<sup>a,\*</sup>

<sup>a</sup> Key Laboratory of Environmental Remediation and Ecological Health, Ministry of Industry and Information Technology, School of Environmental and Biological Engineering, Nanjing University of Science and Technology, Nanjing 210094, China

<sup>b</sup> School of Chemistry and Chemical Engineering, Nanjing University of Science and Technology, Nanjing 210094, China

<sup>c</sup> Nanjing Key Laboratory of Advanced Functional Materials, Nanjing Xiaozhuang University, Nanjing 210094, China.

<sup>d</sup> MIIT Key Laboratory of Advanced Display Material and Devices, School of Materials Science and Engineering, Nanjing University of Science and Technology, 210094, Nanjing, China.

\*Corresponding authors. E-mail addresses: [ychem@njust.edu.cn](mailto:ychem@njust.edu.cn) (Y. Yang), [shenjinyou@mail.njust.edu.cn](mailto:shenjinyou@mail.njust.edu.cn) (J. Shen).

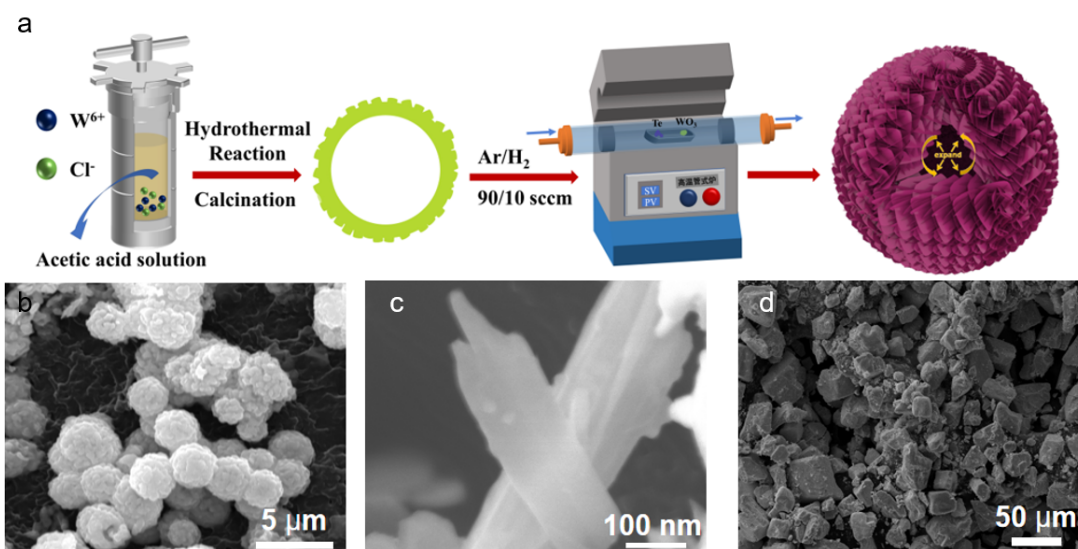

Fig. S1 (a) Illustration of the synthesis of the 3D WTe<sub>2</sub> HNSs; FE-SEM images of (b) WTe<sub>2</sub> HNSs; (c) WTe<sub>2</sub> NRs, d. WTe<sub>2</sub> NPs.

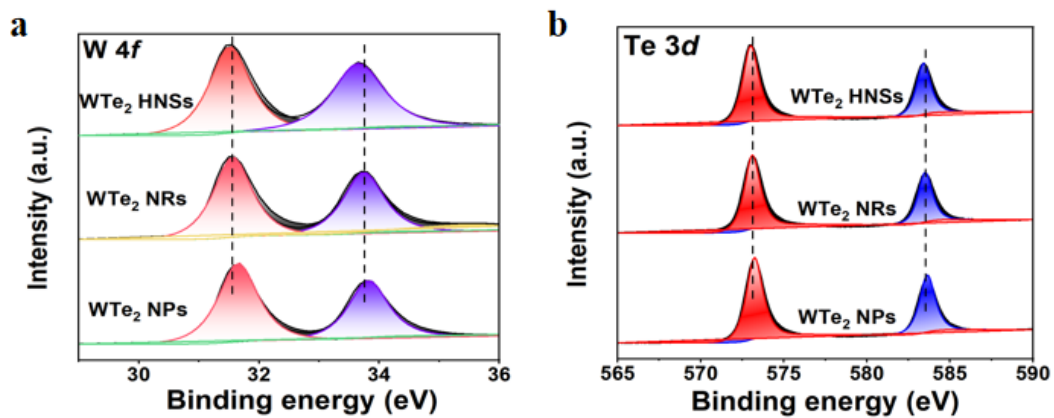

Fig. S2 XPS survey spectra of WTe<sub>2</sub> HNSs, WTe<sub>2</sub> NRs, WTe<sub>2</sub> NPs; (a) W 4*f* and (b) Te 3*d*, respectively.

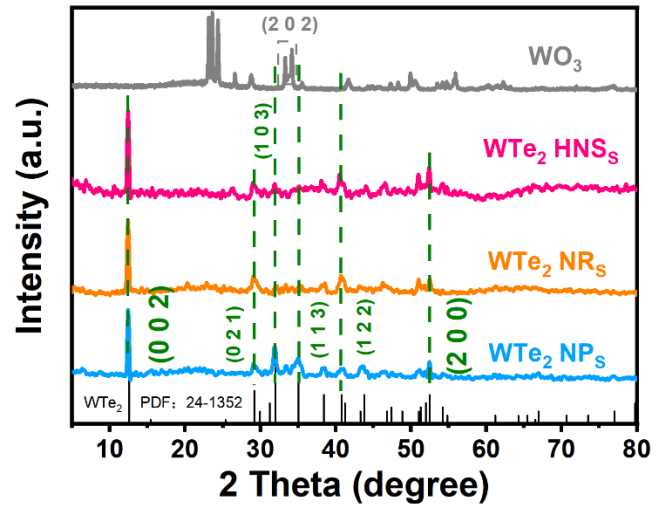

Fig. S3 XRD patterns of  $\text{WO}_3$ ,  $\text{WTe}_2$  HNSs,  $\text{WTe}_2$  NRs and  $\text{WTe}_2$  NPs.

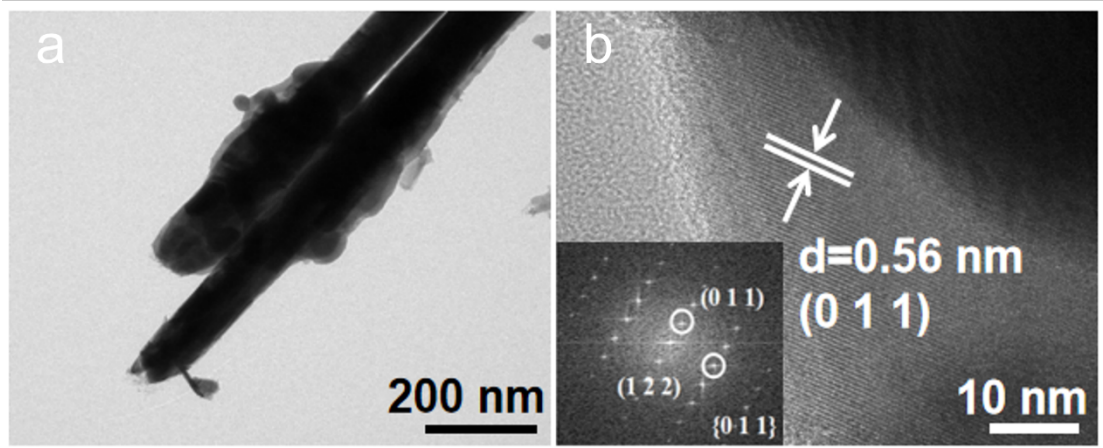

Fig. S4 (a) The TEM image and (b) HRTEM image of  $\text{WTe}_2$  NRs.

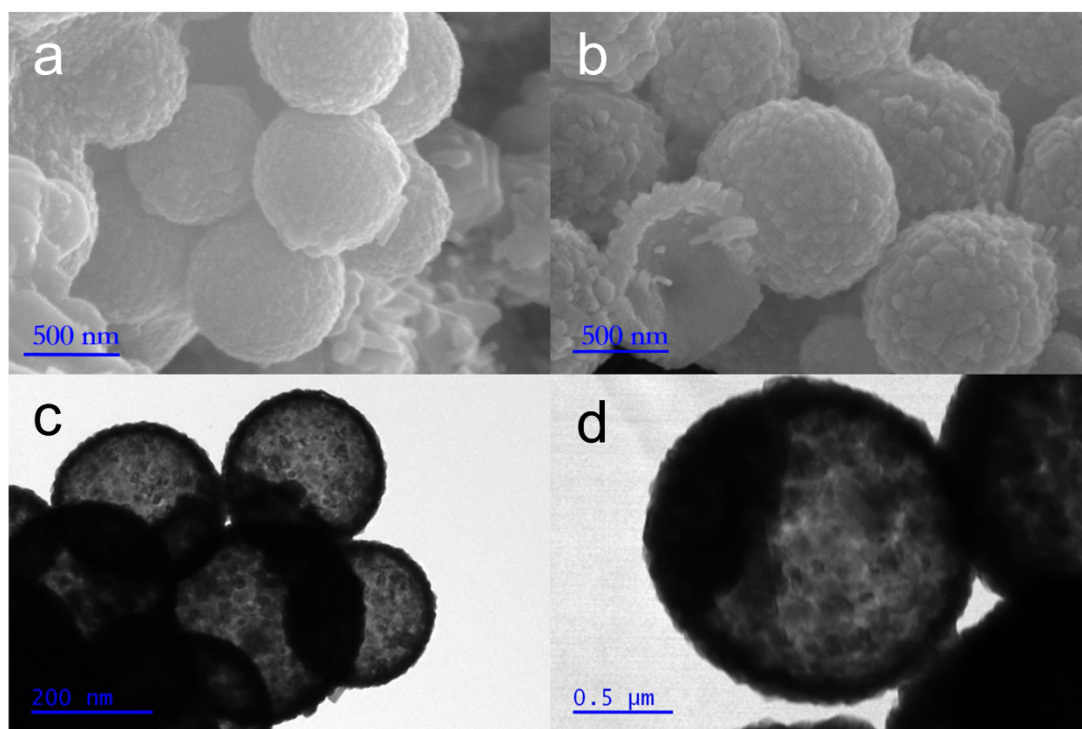

Fig. S5 FE-SEM images and the whole TEM image of  $\text{WO}_3$ .

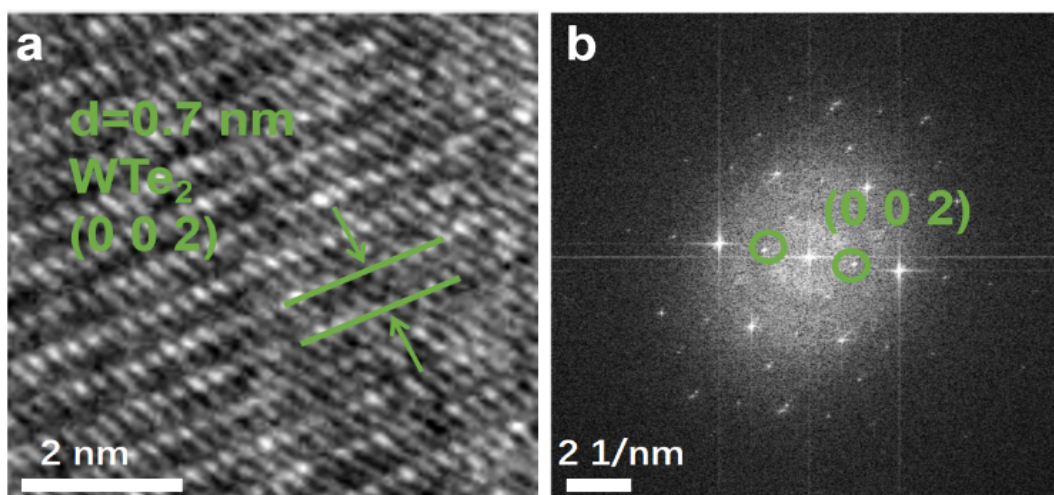

Fig. S6 (a) HAADF STEM image of  $\text{WTe}_2$  HNSs; (b) SAED patterns showing polycrystalline nanomaterials.

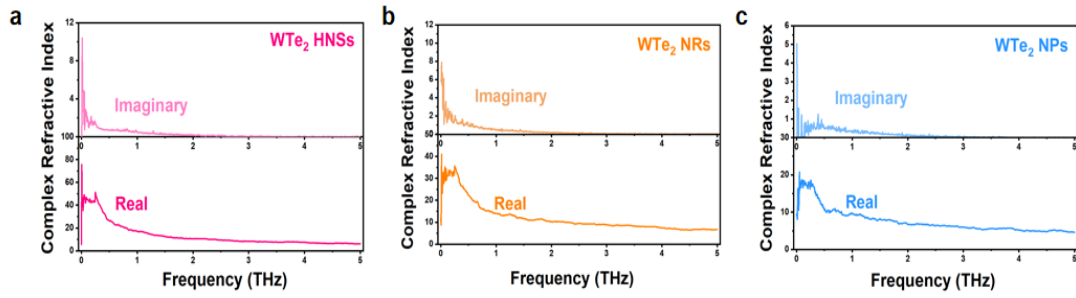

Fig. S7 (a-c) Real and imaginary images of refractive index of WTe<sub>2</sub> HNSs, NRs and NPs samples.

### Complex refractive index

See also: Mathematical descriptions of opacity.

When light passes through a medium, some part of it will always be absorbed. This can be conveniently taken into account by defining a complex refractive index,

$$\underline{n} = n + ik.$$

Here, the real part  $n$  is the refractive index and indicates the phase velocity, while the imaginary part  $k$  is called the optical extinction coefficient or absorption coefficient.



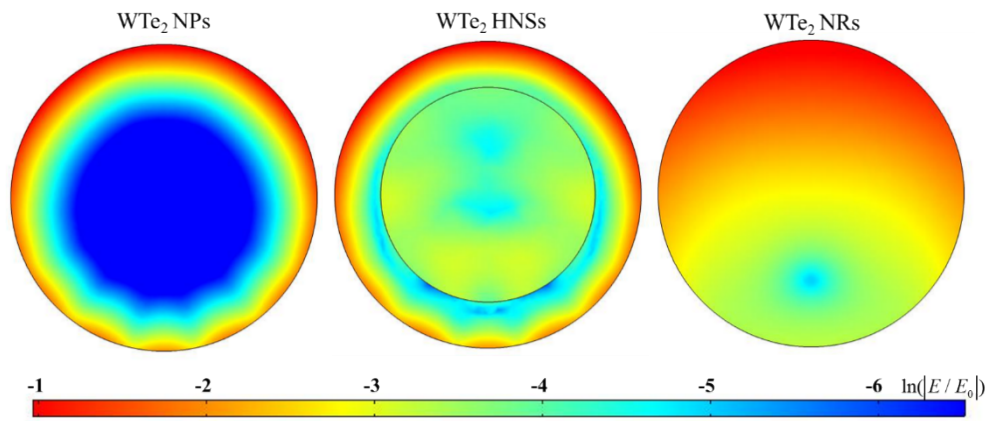

Fig. S8 Simulated electric field distribution of WTe<sub>2</sub> HNSs, NRs and NPs under 450 nm light of WTe<sub>2</sub> HNSs, NRs and NPs samples.

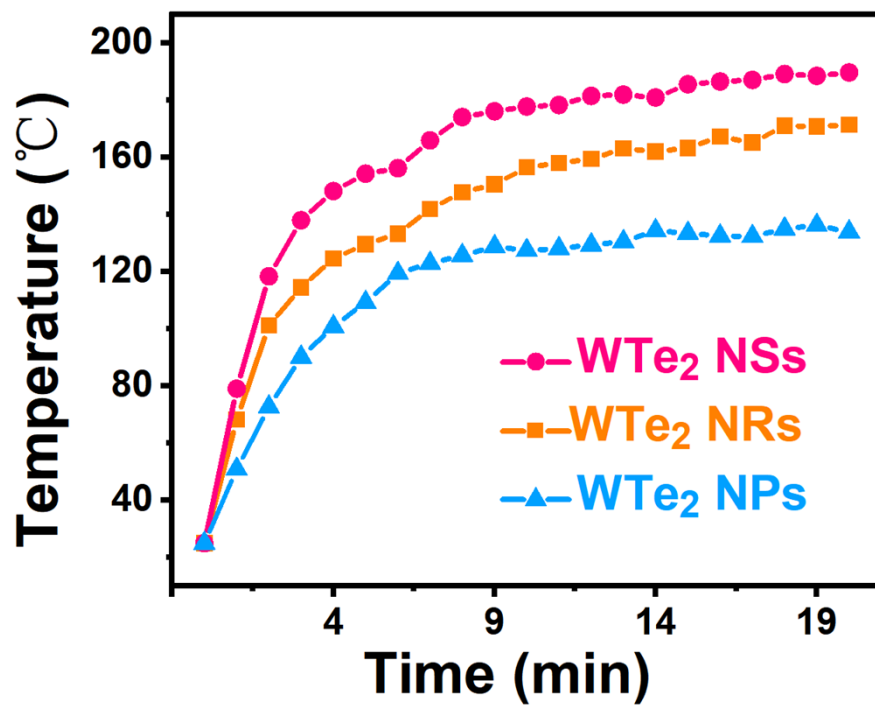

Fig. S9 The temperature curves of different samples under Xe lamp light.

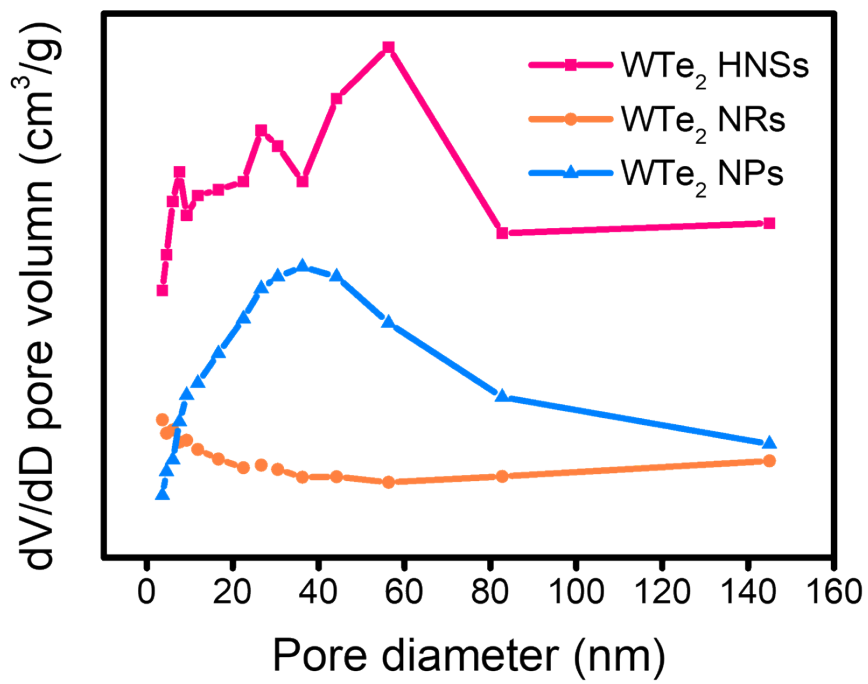

Fig. S10 Pore size distribution curves of different samples.

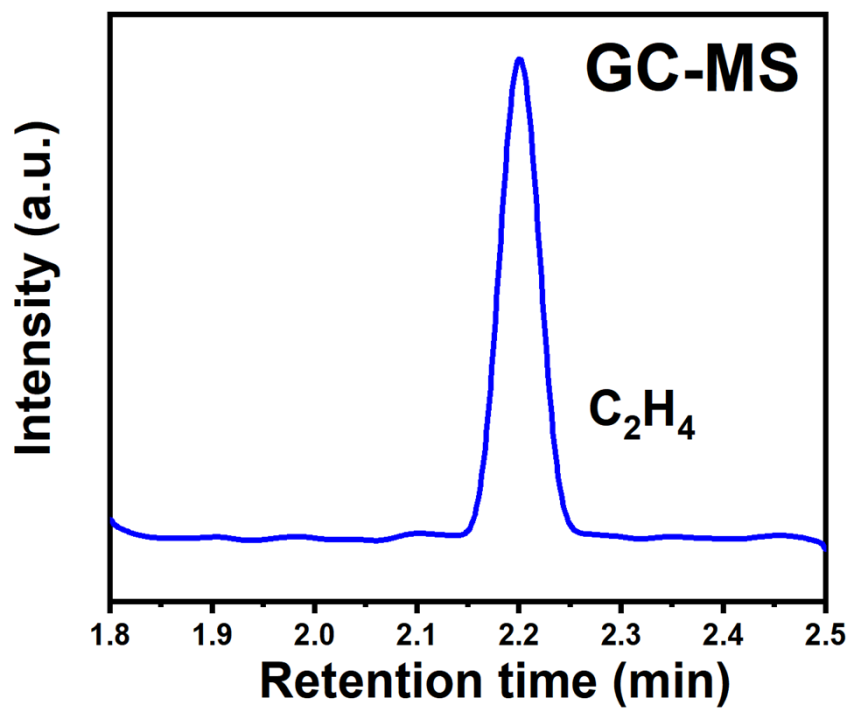

Fig. S11 The isotope analysis of  $^{13}\text{C}_2\text{H}_4$  using  $^{13}\text{CO}_2$  as carbon source by GC-MS.

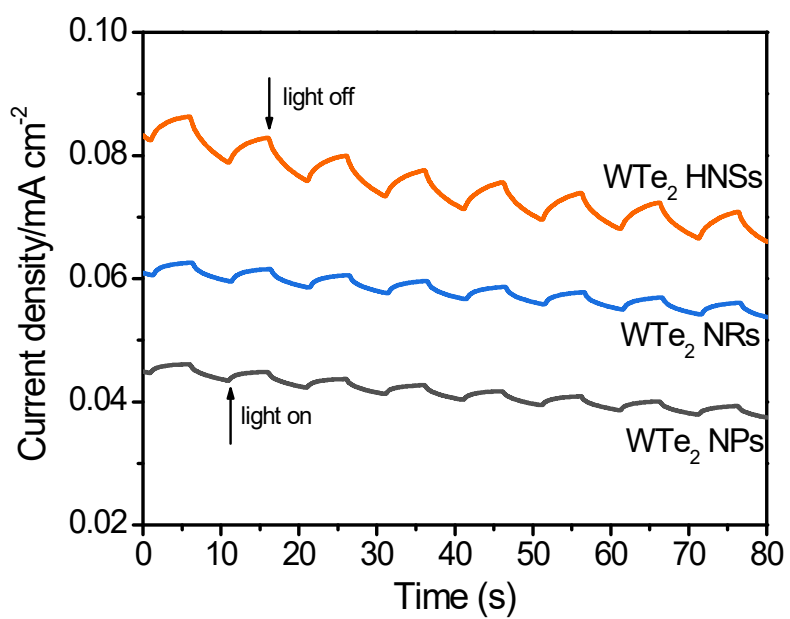

Fig. S12 Photocurrent density measured in 0.5 M KPi buffer solution (pH=7) at open-circuit voltage under AM 1.5 G illumination.

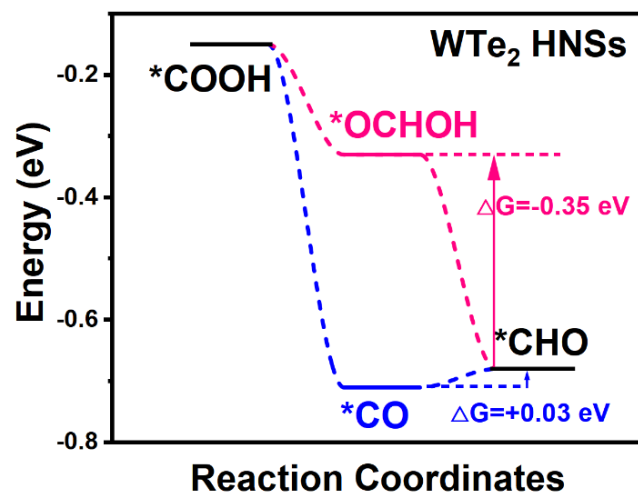

Fig. S13 Speed steps of two kinds of possible  $*\text{COOH}$ - $*\text{CHO}$  pathways over  $\text{WTe}_2$  HNSs.

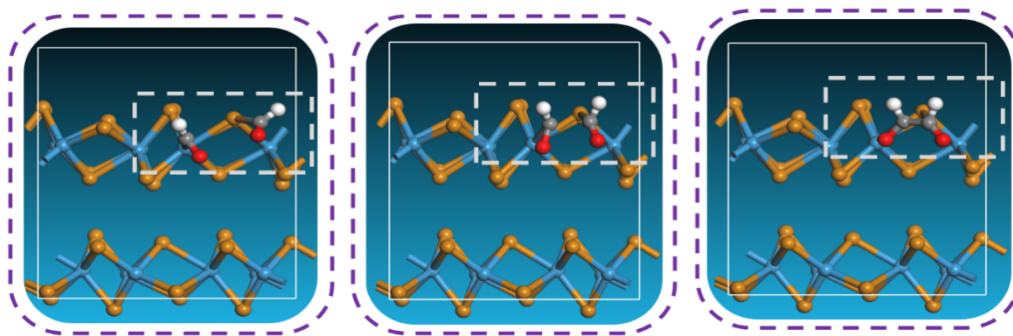

Fig. S14 The structures of the initial states, transition states and final states for CO<sub>2</sub> photothermal catalytic reduction to C<sub>2</sub>H<sub>4</sub> on a WTe<sub>2</sub> HNSs surface (blue spheres = W, orange spheres = Te, red spheres = O, gray spheres = C and white spheres = H).

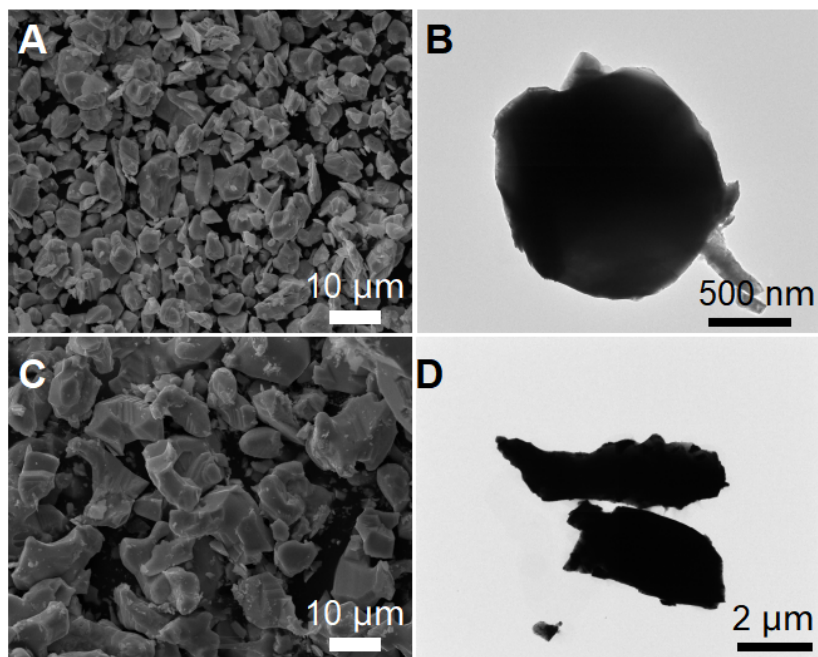

Fig. S15 FE-SEM image of (a)  $\text{PtTe}_2$  and (c)  $\text{NiTe}$ ; the whole TEM image of (b)  $\text{PtTe}_2$  and (d)  $\text{NiTe}$ .



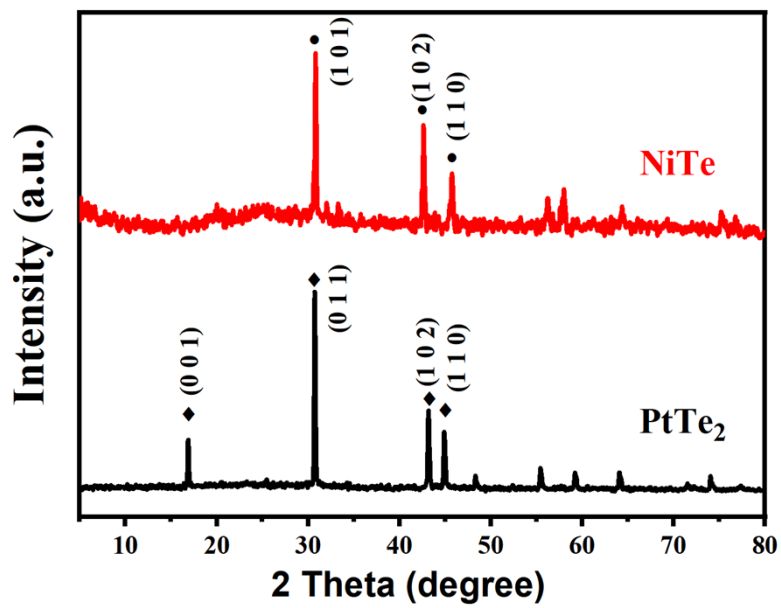

Fig. S16 XRD patterns of PtTe<sub>2</sub> and NiTe.

**Table S1. Performance comparison of WTe<sub>2</sub> and recently reported photothermal catalysts for C<sub>2+</sub> production.**

| <b>Catalyst</b>                                                    | <b>Feeds<br/>(CO<sub>2</sub> +<br/>H<sub>2</sub>O/H<sub>2</sub>)</b> | <b>light<br/>source</b> | <b>C<sub>2+</sub> (μmol/g)</b>                                                            | <b>C<sub>2+</sub> sel.%</b>                                             |
|--------------------------------------------------------------------|----------------------------------------------------------------------|-------------------------|-------------------------------------------------------------------------------------------|-------------------------------------------------------------------------|
| Ni, Co-doped<br>BZCY532 <sup>1</sup>                               | CO <sub>2</sub> +H <sub>2</sub> O                                    | 300W<br>Xe lamp         | C <sub>2</sub> H <sub>6</sub> = 8.64 μmol/g<br>C <sub>3</sub> H <sub>8</sub> =3.22 μmol/g | C <sub>2</sub> H <sub>6</sub> =17%<br>C <sub>3</sub> H <sub>8</sub> =7% |
| CoMn <sub>x</sub> /(MnO <sub>2</sub> ) <sub>2-x</sub> <sup>2</sup> | CO/H <sub>2</sub> /Ar<br>=20/20/60                                   | 300W<br>Xe lamp         | CO<br>conversion:13.9%                                                                    | 32.4%                                                                   |
| WO <sub>3-x</sub> <sup>3</sup>                                     | CO <sub>2</sub> +H <sub>2</sub> O                                    | 300W<br>Xe lamp         | C <sub>2</sub> H <sub>4</sub> =5.3 μmol/g<br>C <sub>2</sub> H <sub>6</sub> =0.93 μmol/g   | >34%                                                                    |
| CoAl-LDH(700) <sup>4</sup>                                         | CO/H <sub>2</sub> /Ar<br>=20/60/20                                   | 300W<br>Xe lamp         | CO conversion:<br>35.4%                                                                   | 36.3%                                                                   |
| CoFe-650 <sup>5</sup>                                              | CO <sub>2</sub> /H <sub>2</sub> /Ar<br>=15/60/25                     | 300W<br>Xe lamp         | CO <sub>2</sub> conversion:<br>82.2%                                                      | 36.42%                                                                  |
| Co/Co <sub>3</sub> O <sub>4</sub> <sup>6</sup>                     | CO/H <sub>2</sub> /Ar<br>=20/60/20                                   | 300W<br>Xe lamp         | CO conversion:<br>15.4%                                                                   | 41.9%                                                                   |
| NiO <sub>x</sub> /Nb <sub>2</sub> O <sub>5</sub> <sup>7</sup>      | CO <sub>2</sub> +H <sub>2</sub>                                      | UV<br>irradiation       | C <sub>2</sub> H <sub>6</sub> =194.18<br>μmol/g                                           | C <sub>2</sub> H <sub>6</sub> =57.5%                                    |
| Ni-500 <sup>8</sup>                                                | CO/H <sub>2</sub> /Ar<br>=20/60/20                                   | 300W<br>Xe lamp         | CO conversion: 15<br>%                                                                    | 65.1%                                                                   |
| <b>WTe<sub>2</sub> NPs<br/>This work</b>                           | <b>CO<sub>2</sub>+H<sub>2</sub>O</b>                                 | <b>300W<br/>Xe lamp</b> | <b>C<sub>2</sub>H<sub>4</sub>=41.6 μmol/g</b>                                             | <b>C<sub>2</sub>H<sub>4</sub>=82%</b>                                   |

|                                                 |                                      |                               |                                                          |                                       |
|-------------------------------------------------|--------------------------------------|-------------------------------|----------------------------------------------------------|---------------------------------------|
| <b>WTe<sub>2</sub> NRs</b><br><b>This work</b>  | <b>CO<sub>2</sub>+H<sub>2</sub>O</b> | <b>300W</b><br><b>Xe lamp</b> | <b>C<sub>2</sub>H<sub>4</sub>=87.7 μmol/g</b>            | <b>C<sub>2</sub>H<sub>4</sub>=87%</b> |
| <b>WTe<sub>2</sub> HNSs</b><br><b>This work</b> | <b>CO<sub>2</sub>+H<sub>2</sub>O</b> | <b>300W</b><br><b>Xe lamp</b> | <b>C<sub>2</sub>H<sub>4</sub>=115.5</b><br><b>μmol/g</b> | <b>C<sub>2</sub>H<sub>4</sub>=88%</b> |

## Supporting Reference

1. J. Tian, Y. Ren, L. Liu, Q. Guo, N. Sha, Z. Zhao, *Mater. Res. Express*, 2020, **7**, 085504.
2. R. Li, Y. Li, Z. Li, W. Wei, S. Ouyang, H. Yuan, T. Zhang, *Sol. RRL*, 2020, **11**, 2000488.
3. Y. Deng, J. Li, R. Zhang, C. Han, Y. Chen, Y. Zhou, W. Liu, P. K. Wong, L. Ye, *Chinese J. Catal.*, 2022, **43**, 1230-1237.
4. Z. Li, J. Liu, Y. Zhao, R. Shi, G. I. N. Waterhouse, Y. Wang, L. Wu, C. H. Tung, T. Zhang, *Nano Energy*, 2019, **60**, 467-475.
5. G. Chen, R. Gao, Y. Zhao, Z. Li, G. I. N. Waterhouse, R. Shi, J. Zhao, M. Zhang, L. Shang, G. Sheng, X. Zhang, X. Wen, L. Wu, C. H. Tung, T. Zhang, *Adv. Mater.*, 2018, **30**, 1704663.
6. Z. Li, J. Liu, Y. Zhao, G. I. N. Waterhouse, G. Chen, R. Shi, X. Zhang, X. Liu, Y. Wei, X. Wen, L. Wu, C. H. Tung, T. Zhang, *Adv. Mater.*, 2018, **30**, 1800527.
7. Z. Wang, M. Xiao, X. Wang, H. Wang, X. Chen, W. Dai, Y. Yu, X. Fu, *Appl. Surf. Sci.*, 2022, **592**, 153246.
8. Y. Wang, Y. Zhao, J. Liu, Z. Li, G. I. N. Waterhouse, R. Shi, X. Wen, T. Zhang, *Adv. Energy Mater.*, 2020, **10**, 1902860.
